# Supplementary material for: Combined effects of P25 TiO2 nanoparticles and disposable face mask leachate on microalgae Scenedesmus obliquus: analysing the effects of heavy metals
Source: Royal Society of Chemistry journal article supplement (doi:10.1039/d3em00120b), 2023-01-01
Supplement: d3em00120b1.pdf [file d3em00120b1.pdf]

## Supplementary information

### **Combined effects of P25 TiO<sub>2</sub> nanoparticles and disposable face mask leachate on microalgae *Scenedesmus obliquus*: Analysing the effects of heavy metals**

Soupam Das<sup>a</sup>, Amitava Mukherjee<sup>a\*</sup>

<sup>a</sup>Centre for Nanobiotechnology, Vellore Institute of Technology, Vellore, India

Corresponding Author

\*Amitava Mukherjee

Senior Professor and Director

Centre for Nanobiotechnology

Vellore Institute of Technology, Vellore 632014, India

Email: [amitav@vit.ac.in](mailto:amitav@vit.ac.in)

## **Materials and methods:**

### ***Assessing growth parameters and biochemical assays in algae***

**Method S1:** The fluorescent dye DCFH-DA was used to calculate the total reactive oxygen species (ROS) generated by the treated algal cells. After the algae had been exposed to the toxicants for 72 h, samples were incubated with DCFH-DA dye (50  $\mu$ L of 100  $\mu$ M) for 30 mins in the dark. After incubation, the fluorescence intensity of the samples was evaluated using a fluorescence spectrophotometer (Cary Eclipse, G9800A; Agilent Technologies, USA). The excitation and emission wavelengths were 485 nm and 530 nm, respectively (1). The obtained intensities were compared to the intensities of the control algal cells. Under abiotic conditions, there was no apparent increase in the fluorescence intensity.

**Method S2:** The MDA concentration was determined by subjecting the interacted algal samples to 30 mins of heating in a water bath at a temperature of 95 °C along with the mixture of TBA and TCA (0.25% (w/v) TCA in 10% (w/v) TBA) (2). Following centrifugation, a UV-Vis spectrophotometer (xMARK microplate absorbance spectrophotometer, BIO-RAD) was used to evaluate the absorbance of the supernatants at 532 and 600 nm.

**Method S3:** The comprehensive method for analyzing superoxide dismutase (SOD) activity can be followed from the study published by Kono in 1978 Kono (27). After incubation, the cell pellet was recovered by centrifuging the sample at 7000 rpm for 10 mins at 4 °C, washed, and then homogenizing it in 0.5 M phosphate buffer before centrifuging it again for 20 mins at 4 °C. Following centrifugation, the following components were added to 100  $\mu$ l of the supernatant: 50 mM Na<sub>2</sub>CO<sub>3</sub>, 96 mM nitro tetrazolium blue chloride, 0.6% triton x-100, and 20 mM hydroxylamine hydrochloride. This mixture was then incubated at 37 °C for 20 mins under visible light conditions. Following incubation, the absorbance of these samples was

determined using a UV-spectrophotometer (xMARK microplate absorbance spectrophotometer, BIO-RAD) at 560 nm.

**Method S4:** To perform the catalase assay, the interacted algal samples were centrifuged at 7000 rpm for 10 mins at 4 °C after being incubated for 72 h. One past study on catalase assay showed the detailed procedure to perform this experiment Romanowska-Duda, Grzesik (28). After centrifugation, they were rinsed with sterile 0.5 M PBS and homogenized. After adding 1 ml of a newly prepared H<sub>2</sub>O<sub>2</sub> solution (10 mM) to 2 ml of supernatant, the absorbance at 240 nm was measured for 3 minutes using a spectrophotometer (Hitachi U-2910 Japan). The reaction mixture without H<sub>2</sub>O<sub>2</sub> was used as a control.

**Method S5:** A photosynthesis yield analyzer (Mini PAM, made by Heinz Walz in Germany) was used to detect chlorophyll fluorescence and the electron transport rate in the samples. This was performed to quantify the level of stress that the toxicant was putting on algal photosystem II. After 72 h of exposure, the samples were put in a dark condition for 30 mins. Following that, 200 µl of the interacted algal samples were placed into the chamber of the Photosynthesis Yield Analyzer (Mini PAM), and a high-intensity actinic light was used to evaluate the F<sub>v</sub>/F<sub>m</sub> ratio and the ETR max value. The ratio of the maximum photochemical quantum yield of the PS II system in treated and control algal cells is denoted by the symbol F<sub>v</sub>/F<sub>m</sub>, where F<sub>v</sub> stands for variable fluorescence, and F<sub>m</sub> stands for the maximum fluorescence released by the samples when exposed to high intensities of actinic light. Graphs were used to illustrate these findings compared to the control samples.

**Figures:**

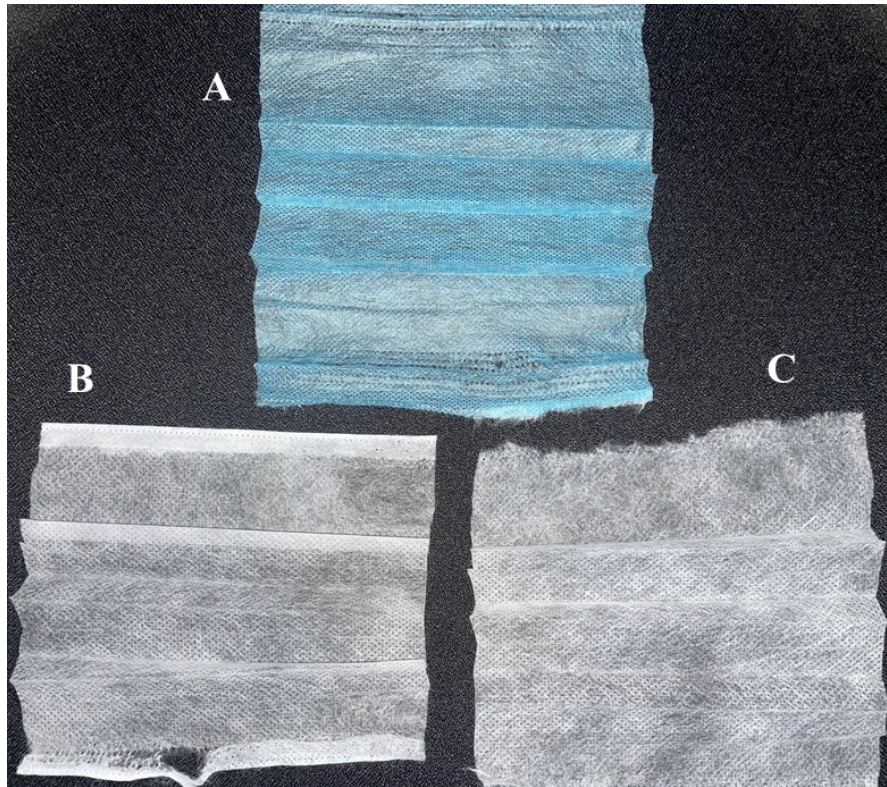

**Fig. S1: Different layers of disposable surgical face mask (A) Outer (B) Middle (C) Inner**

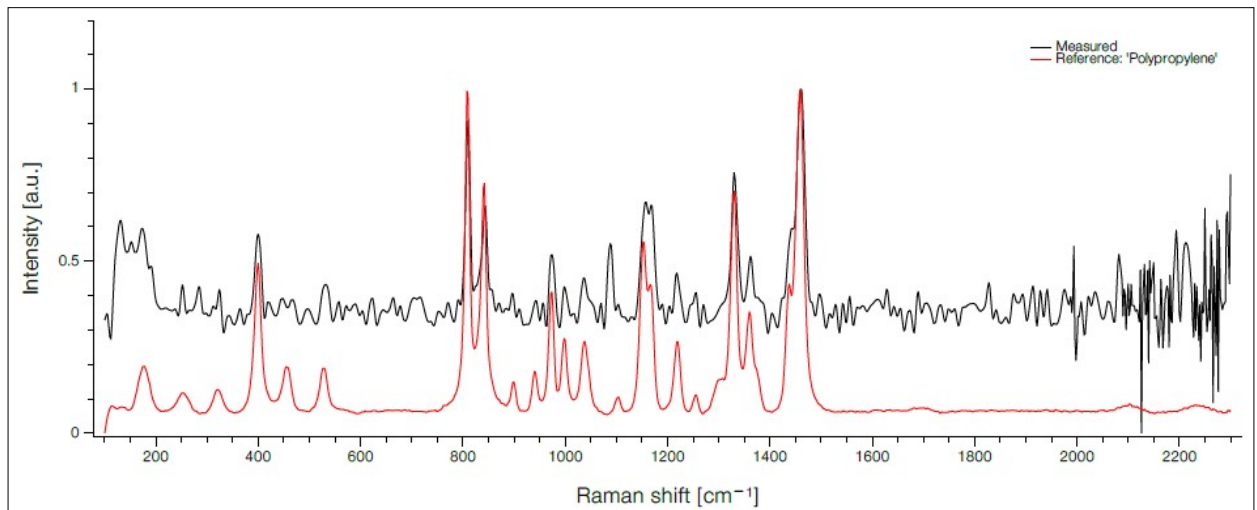

**Fig. S2: Raman spectra of leachates from the face mask**

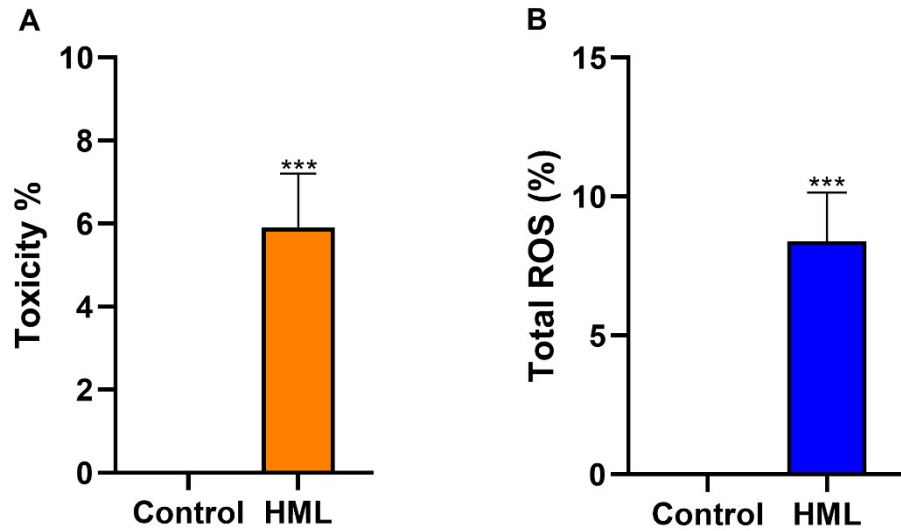

Fig. S3: (A) Toxicity percentage of HML when interacted with *Scenedesmus obliquus* (B) Total ROS produced when interacted with FML. ‘\*’ symbolizes a significant difference in percentage observed with respect to control (\*\*\*) =  $p < 0.001$ )

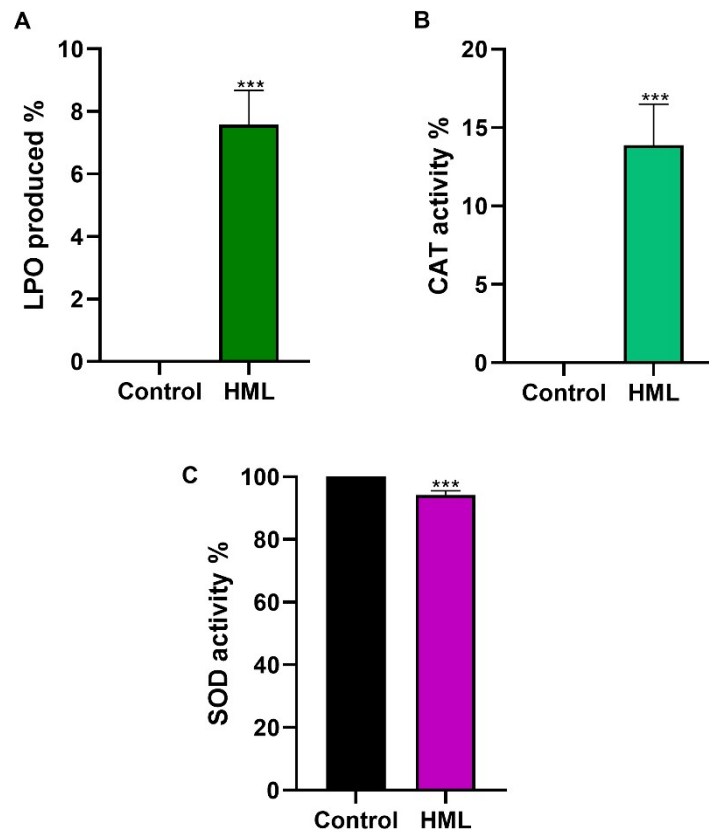

Fig. S4: (A) LPO produced when interacted with HML (B) CAT activity when interacted with HML (C) SOD activity when interacted with HML. ‘\*’ symbolizes a significant difference in percentage observed with respect to control (\*\*\*) =  $p < 0.001$ )

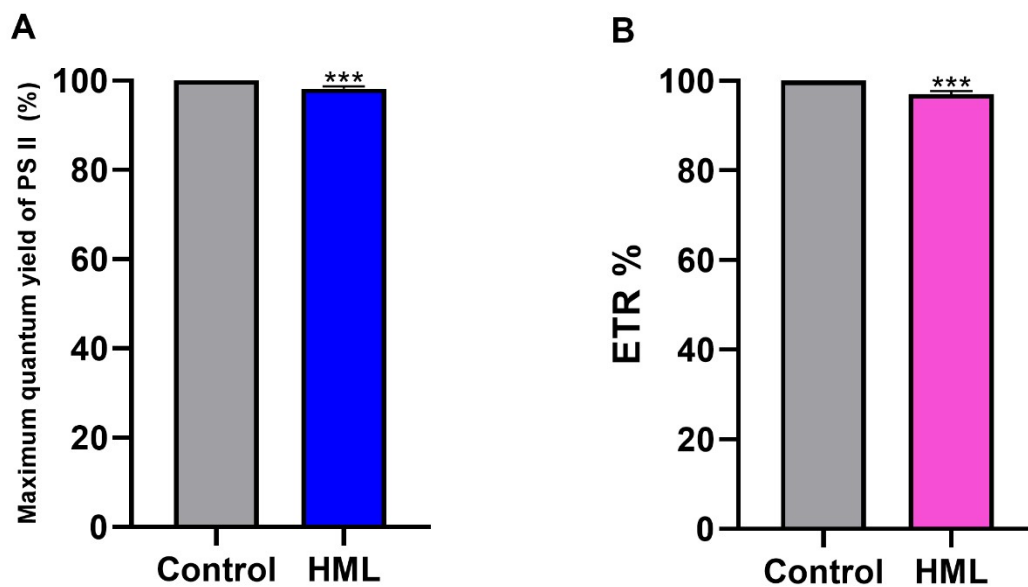

Fig. S5: **Fig. 6:** (A) Maximum quantum yield of PSII after exposure to HML (B) Electron transport rate after exposure to HML. ‘\*’ symbolizes a significant difference in percentage observed with respect to control (\*\*\*) =  $p < 0.001$ ).

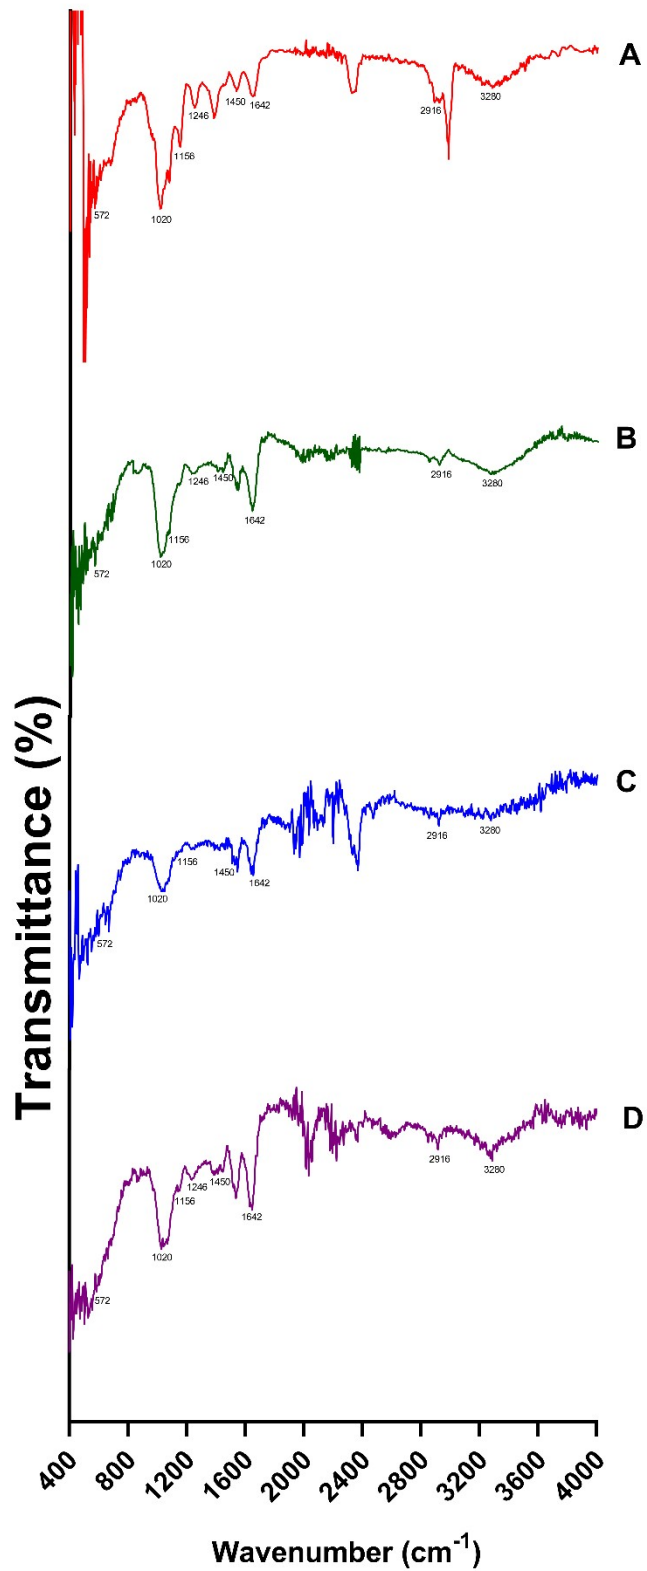

**Fig S6: FTIR spectra of algae when treated with (A) Control (B) 4  $\text{mg L}^{-1}$  of  $\text{nTiO}_2$  (C) FML (D)  $\text{nTiO}_2$  (4  $\text{mg L}^{-1}$ ) + FML**

**Tables:**

| <b>Elemental Symbol</b> | <b>Concentration in ppm<br/>(mg/L)</b> |
|-------------------------|----------------------------------------|
| Cd                      | 0.010                                  |
| Cr                      | 0.006                                  |
| Cu                      | 0.005                                  |
| Hg                      | 0.356                                  |
| Pb                      | 0.006                                  |
| Sb                      | 0.027                                  |
| Ti                      | 0.342                                  |
| Zn                      | 0.015                                  |

**Table S1: ICP-OES analysis of filtered face mask leachate**

| <b>Wavenumber<br/>(cm<sup>-1</sup>)</b> | <b>Pristine<br/>nTiO<sub>2</sub> treated</b> | <b>Pristine<br/>FML treated</b> | <b>nTiO<sub>2</sub> +<br/>FML treated</b> | <b>Peak assignment</b>                   |
|-----------------------------------------|----------------------------------------------|---------------------------------|-------------------------------------------|------------------------------------------|
| 572                                     | ↓                                            | ↑↑                              | ↑                                         | C=O bending                              |
| 850                                     | ↑↑                                           | ↓                               | ↑                                         | Attributed to the<br>presence of Ti-O-Ti |
| 1020                                    | ↑                                            | ↑↑                              | ↑                                         | C-O stretching                           |
| 1156                                    | ↓                                            | ↑↑                              | ↑                                         | C-O-C stretching                         |



|      |    |   |   |                                              |
|------|----|---|---|----------------------------------------------|
| 1246 | ↓  | ↑ | ↑ | Protein amide III, $\alpha$ -helix structure |
| 1450 | ↓↓ | ↑ | ↑ | CH <sub>3</sub> and CH <sub>2</sub> bending  |
| 1642 | ↑  | ↑ | ↑ | C-O stretching                               |
| 2916 | ↓↓ | ↑ | ↑ | Asymmetric vibrations of nucleic acid        |
| 3280 | ↑  | ↑ | ↑ | -NH and -OH bond stretching of lipids        |

**Table S2:** Spectral changes upon treatment with nTiO<sub>2</sub>, FML and nTiO<sub>2</sub> + FML

↑: Increased change in % Transmittance; ↑↑: Strongly increased change in % Transmittance;

↓: Decreased change in % Transmittance; ↓↓: Strongly change in % Transmittance

## References

1. Giri S, Mukherjee A. Ageing with algal EPS reduces the toxic effects of polystyrene nanoplastics in freshwater microalgae *Scenedesmus obliquus*. *Journal of Environmental Chemical Engineering*. 2021;9(5):105978.
2. Natarajan L, Jenifer MA, Chandrasekaran N, Suraishkumar G, Mukherjee A. Polystyrene nanoplastics diminish the toxic effects of Nano-TiO<sub>2</sub> in marine algae *Chlorella* sp. *Environmental Research*. 2022;204:112400.
